# Supplementary material for: Drivers and determinants of strain dynamics following fecal microbiota transplantation
Source: PubMed Central journal article supplement (PMC9499871; doi:10.1038/s41591-022-01913-0), 2022-09-15
Supplement: 41591_2022_1913_MOESM1_ESM.pdf [file 41591_2022_1913_MOESM1_ESM.pdf]

**Supplementary information**

---

**Drivers and determinants of strain dynamics following fecal microbiota transplantation**

---

In the format provided by the authors and unedited

**Figure S1.** Strain-level outcomes for 307 prevalent species tracked across FMT time series. FMTs (columns) are organized by indication, scope (allogenic vs autologous) and clinical success. Species (rows) are organized by underlying phylogeny, corresponding to what is shown in Fig 4.

**Figure S2.** Ternary plots of the post-FMT strain population space for each of 307 prevalent species. Each dot corresponds to a *conspecific* FMT outcome for the focal species; non-conspecific outcomes (acquisition or loss of entire strain population, complete failure to colonize) are not shown. This is an extension to Fig 4A which shows a subset of these plots.

**Figure S3.** Collinearity of relevant predictor variables. The heatmap shows pairwise Spearman correlation values between candidate predictor variables, organized by type, scope & resolution as outlined in table S6.

**Note:** *supplementary tables are included in the submission as an xlsx file as 'source data' in order to be editable and accessible. Tables S1, S5 & S6 are also included in this PDF for reference. The data tables (S2, S3, S4, S7, S8) are moreover part of the source datasets deposited on Zenodo (see main text).*

**Table S1.** Overview of datasets used in this study.

**Table S2.** Contextual information for 295 FMT time series.

**Table S3.** Contextual information for all 1,492 analyzed fecal metagenome samples (with information on technical replicates).

**Table S4.** Contextual data for 1,089 species included in this study.

**Table S5.** Strain-level FMT outcome scoring rules, based on determinant microbial SNVs and gene content per species pan-genome in sample triads of donor baseline, recipient baseline and recipient post-FMT. See Methods and Fig 1C for details and visualization.

**Table S6.** Overview and definitions of variables tested for association with FMT outcomes. Variables are categorized by type, scope (pertaining to the host or microbiome, to the donor or recipient) and resolution (host-level, community-level, species-level, strain-level). See Methods for additional details.

**Table S7.** mOTU taxonomic profiles.

**Table S8.** GMM profiles.





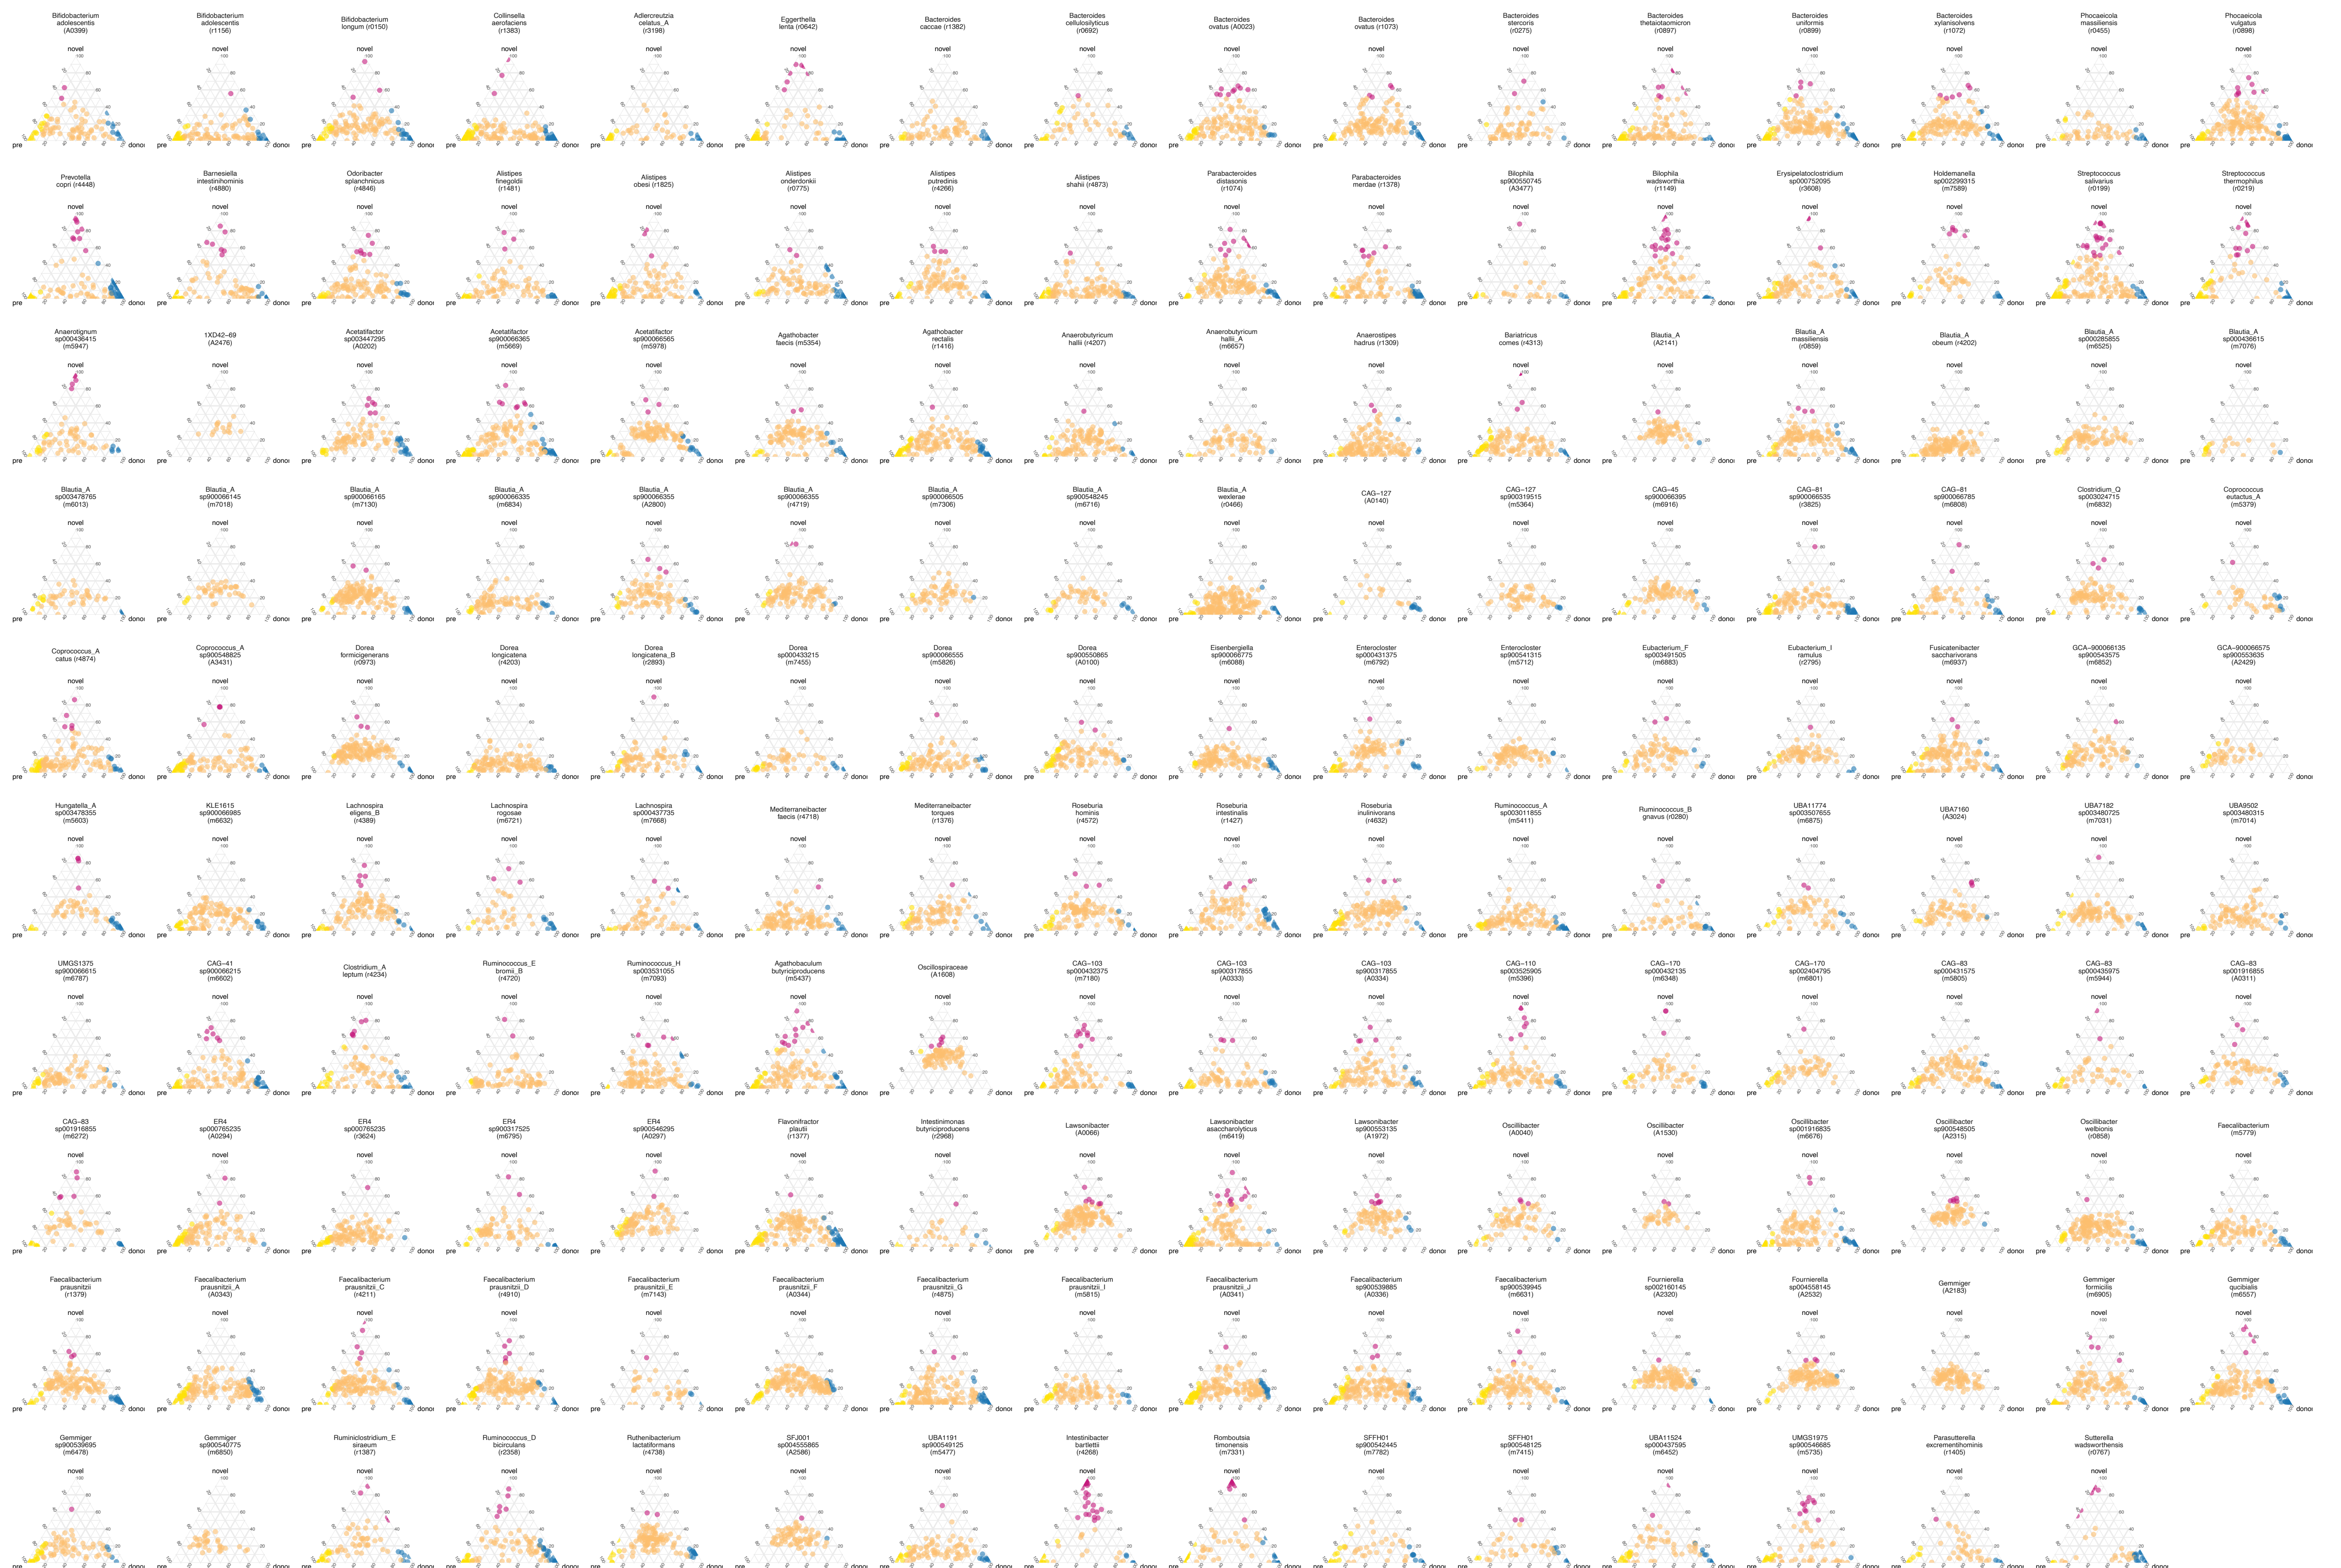

outcome    coexistence    colonisation (consp.)    novel strains (consp.)    persistence (consp.)



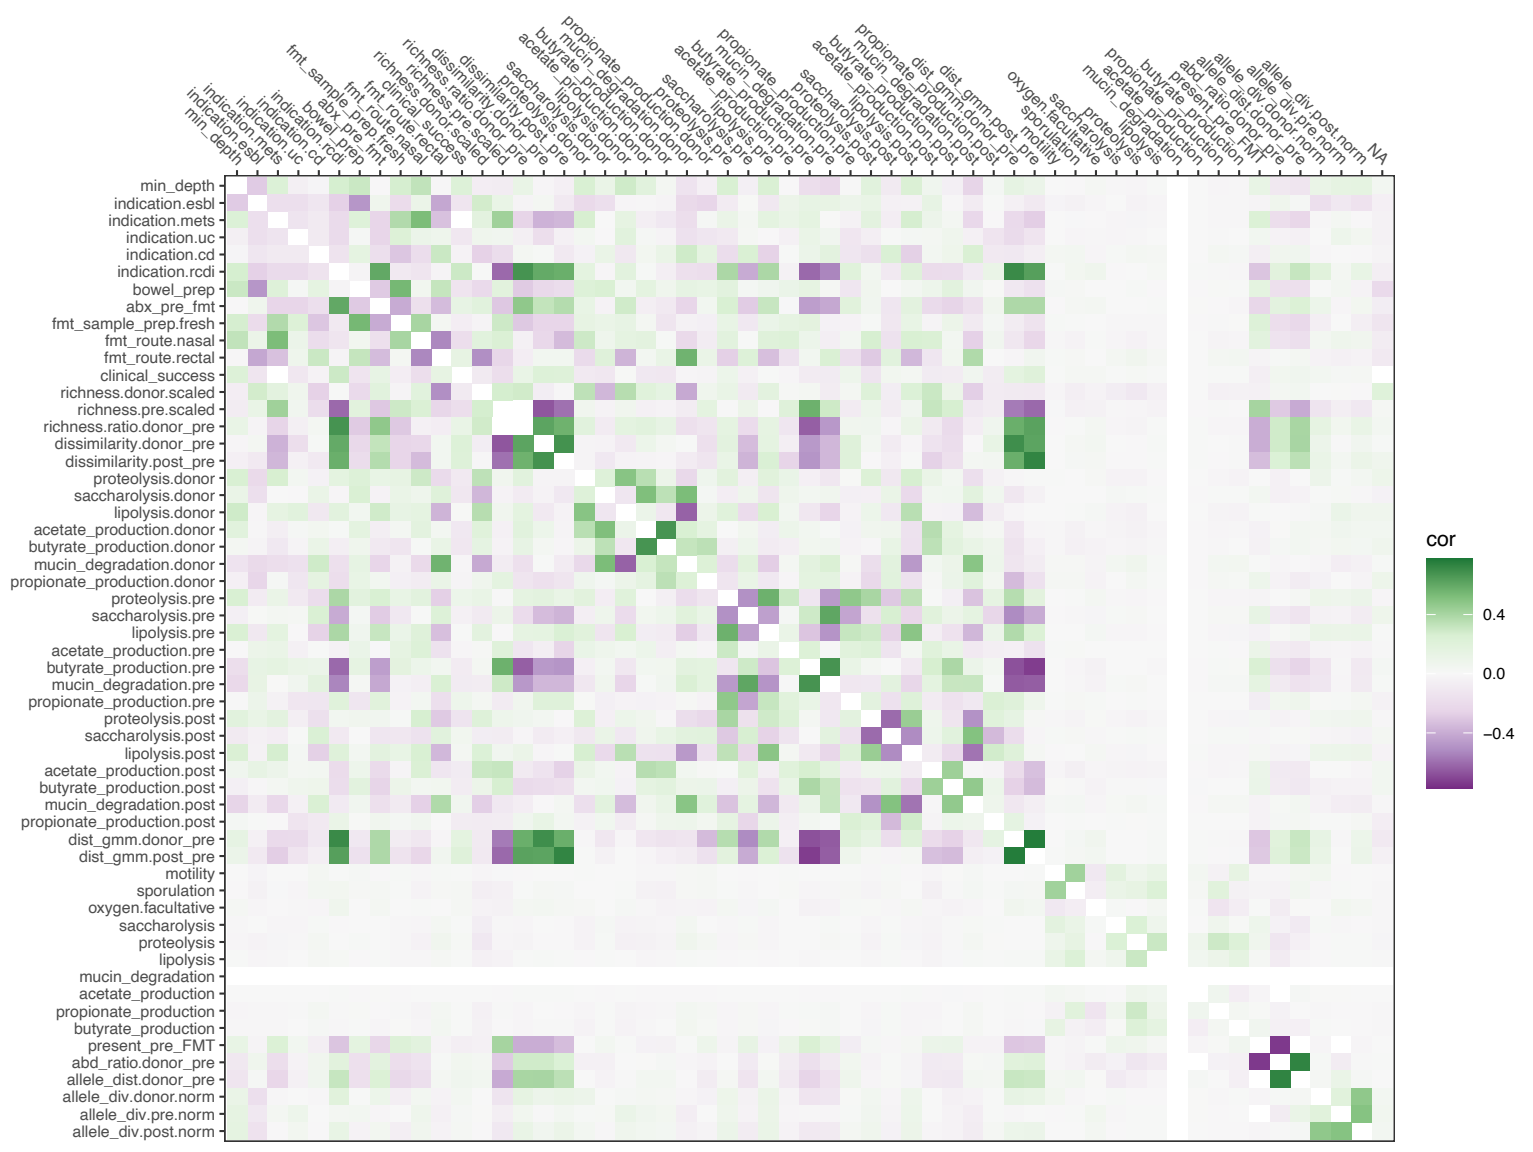

| study_id            | disease_indication                                          | study_ref                                                                               | n_patients | n_allogenic_fmts | n_full_triads | n_autologous_fmts | raw_data_accession       |
|---------------------|-------------------------------------------------------------|-----------------------------------------------------------------------------------------|------------|------------------|---------------|-------------------|--------------------------|
| MetS_NL_1           | metabolic syndrome                                          | Li et al, 2016 (PMID: 27126044); Kootte et al, 2017 (PMID: 28978426); <b>this study</b> | 26         | 16               | 16            | 16                | 10 PRJEB12357,PRJEB46778 |
| UC_NL               | ulcerative colitis                                          | Rossen et al, 2015 (PMID: 25836986); <b>this study</b>                                  | 27         | 16               | 13            | 11                | PRJEB46777               |
| ABXR_NL             | antibiotics resistance                                      | Singh et al, 2018 (PMID: 25836986); <b>this study</b>                                   | 14         | 19               | 15            | 0                 | PRJEB46779               |
| div_AU              | recurrent <i>C. difficile</i> infection; ulcerative colitis | <b>this study</b>                                                                       | 5          | 5                | 5             | 0                 | PRJEB46780               |
| MetS_NL_Koopen      | metabolic syndrome                                          | Koopen et al, 2021 (PMID: 34177842)                                                     | 24         | 12               | 12            | 12                | PRJEB44237               |
| ABXR_div_Leo        | antibiotics resistance                                      | Leo et al, 2020 (PMID: 32585945)                                                        | 26         | 26               | 16            | 0                 | PRJEB35816               |
| ABXR_IS_BarYoseph   | antibiotics resistance                                      | Bar-Yoseph et al, 2021 (PMID: 32511695)                                                 | 14         | 14               | 12            | 0                 | PRJNA628604              |
| RCDI_US_Smillie     | recurrent <i>C. difficile</i> infection                     | Smillie et al, 2018 (PMID: 29447696)                                                    | 19         | 22               | 19            | 0                 | PRJEB23524               |
| RCDI_US_Aggarwala   | recurrent <i>C. difficile</i> infection                     | Aggarwala et al, 2021 (PMID: 34580445)                                                  | 18         | 14               | 13            | 0                 | PRJNA637878              |
| RCDI_US_Watson      | recurrent <i>C. difficile</i> infection                     | Watson et al, 2021 (biorxiv)                                                            | 10         | 10               | 10            | 0                 | PRJNA701961              |
| RCDI_US_Podlesny    | recurrent <i>C. difficile</i> infection                     | Podlesny et al, 2022 (PMID: 35337386)                                                   | 8          | 8                | 8             | 0                 | PRJEB39023               |
| RCDI_US_Moss        | recurrent <i>C. difficile</i> infection                     | Moss et al, 2017 (PMID: 28827811)                                                       | 6          | 6                | 2             | 0                 | PRJNA349197              |
| UC_US_Damman        | ulcerative colitis                                          | Damman et al, 2015 (PMID: 26288277)                                                     | 6          | 6                | 6             | 0                 | PRJNA285502              |
| UC_US_Nusbaum       | ulcerative colitis                                          | Nusbaum et al, 2018 (PMID: 30010747)                                                    | 4          | 4                | 4             | 0                 | PRJNA438164              |
| UC_US_Lee           | ulcerative colitis                                          | Lee et al, 2017 (PMID: 28473000)                                                        | 2          | 2                | 2             | 0                 | PRJNA353655              |
| CD_US_Vaughn        | Crohn's disease                                             | Vaughn et al, 2016 (PMID: 27542133)                                                     | 18         | 18               | 15            | 0                 | PRJNA321058              |
| IBS_NO_Goll         | irritable bowel syndrome                                    | Goll et al, 2020 (PMID: 32991818)                                                       | 30         | 30               | 21            | 0                 | PRJEB36140               |
| MEL_US_Davar        | melanoma (anti-PD1 treatment)                               | Davar et al, 2021 (PMID: 33542131)                                                      | 26         | 27               | 15            | 0                 | PRJNA672867              |
| MEL_IS_Baruch       | melanoma (anti-PD1 treatment)                               | Baruch et al, 2021 (PMID: 33303685)                                                     | 10         | 10               | 10            | 0                 | PRJNA678737              |
| REN_IT_Ianiri       | renal carcinoma                                             | Ianiri et al, 2020 (PMID: 32859933)                                                     | 10         | 10               | 7             | 0                 | PRJNA643802              |
| TOU_CN_Zhao         | Tourette's syndrome                                         | Zhao et al, 2020 (PMID: 33424650)                                                       | 5          | 5                | 5             | 0                 | PRJNA628029              |
| CTR_RU_Goloshchapov | healthy volunteers                                          | Goloshchapov et al, 2019 (PMID: 31888470)                                               | 3          | 3                | 3             | 0                 | PRJNA510036              |

**species presence**

| <b>scenario</b>             | <b>D</b> | <b>R</b> | <b>P</b> | <b>determinant variants</b>                   | <b>description</b>                                                                                                                                     |
|-----------------------------|----------|----------|----------|-----------------------------------------------|--------------------------------------------------------------------------------------------------------------------------------------------------------|
| not observed                | N        | N        | N        | %                                             | no marker gene coverage in any sample of the donor-pre-post triplet                                                                                    |
| species loss                | N/Y      | Y        | N        | %                                             | species present pre-FMT, but not post FMT                                                                                                              |
| rejection                   | Y        | N        | N        | %                                             | species present in donor, but not detectable in recipient post-FMT                                                                                     |
| persistence                 | N        | Y        | Y        | $R > P$                                       | recipient strain populations are retained after FMT                                                                                                    |
| persistence (conspecific)   | Y        | Y        | Y        | $R > 8 * D \ \& \ P < (R+D)$                  | recipient strains remain dominant, >8-fold higher than donor strains                                                                                   |
| coexistence (conspecific)   | Y        | Y        | Y        | $R < 8 * D \ \& \ D < 8 * R \ \& \ P < (R+D)$ | donor and recipient strain populations coexist, at a ratio of >1:8                                                                                     |
| colonisation (conspecific)  | Y        | Y        | Y        | $D > 8 * R \ \& \ P < (R+D)$                  | donor strains take over, >8-fold higher than recipient strains post-FMT                                                                                |
| colonisation                | Y        | N        | Y        | $D > P$                                       | species not present in recipient pre-FMT, donor strains outweigh novel strains post-FMT                                                                |
| novel strains (conspecific) | N        | Y        | Y        | $P \geq R$                                    | recipient strains are replaced by strains that are <i>not</i> from the donor (but either environmental or previously undetected in donor or recipient) |
|                             | Y        | Y        | Y        | $P \geq (R+D)$                                |                                                                                                                                                        |
| novel strains               | N        | N        | Y        | %                                             | species not detectable pre-FMT, from environment or blooming                                                                                           |
|                             | Y        | N        | Y        | $P > D$                                       |                                                                                                                                                        |

**summarised scenarios**

*resilience of recipient strains*

persistence, persistence (conspecific) or coexistence (conspecific)

*takeover by donor strains*

colonisation or colonisation (conspecific)

*turnover of recipient strains*

colonisation, colonisation (conspecific), novel strains or novel strains (conspecific)

D: donor baseline

R: recipient pre-FMT baseline

P: recipient post-FMT

| Scope                                 | Variable                                                  | D | R | P | D:R | R:P | Definition                                                                                                                   |
|---------------------------------------|-----------------------------------------------------------|---|---|---|-----|-----|------------------------------------------------------------------------------------------------------------------------------|
| host:<br>clinical & procedural        | minimum sequencing depth in triplet                       | Y | Y | Y |     |     | minimum sequencing depth of donor, pre- and post-FMT samples                                                                 |
|                                       | indication (rCDI, UC, CD, MetS, ESBL)                     |   | Y |   |     |     | indication in recipient, encoded as binary variable (1, 0) for each indication                                               |
|                                       | bowel preparation                                         |   | Y |   |     |     | bowel preparation before FMT; confounded with study/indication                                                               |
|                                       | antibiotics pre-treatment                                 |   | Y |   |     |     | antibiotics usage during 4 weeks leading up to FMT; fully confounded with indication (antibiotics used by rCDI patients)     |
|                                       | stool sample preparation                                  | Y |   |   |     |     | stool sample preparation for FMT (fresh = 1; frozen = 0)                                                                     |
|                                       | FMT route                                                 |   | Y |   |     |     | FMT administration route (nasogastric or nasoduodenal tube = 1; colonoscopy and/or enema = 0)                                |
| microbiome:<br>taxonomic diversity    | clinical success                                          |   | Y |   |     |     | indication-specific endpoint at latest recorded timepoint post FMT (yes/no)                                                  |
|                                       | species richness                                          | Y | Y | Y |     |     | rarefied species richness, scaled to unit variance                                                                           |
|                                       | richness ratio                                            |   |   |   | Y   | Y   | ratio of species richness (e.g., D/R, P/R)                                                                                   |
|                                       | functional redundancy                                     | Y | Y | Y |     |     | ratio of functional diversity (rarefied KO richness) and species richness, scaled to unit variance                           |
|                                       | community dissimilarity                                   |   |   |   | Y   | Y   | Bray-Curtis dissimilarity of microbiome community composition                                                                |
|                                       | enterotype ( <i>Prev.</i> , <i>Bact.</i> , <i>Firm.</i> ) | Y | Y | Y |     |     | enterotype, classified based on genus abundances                                                                             |
| microbiome:<br>metabolic potential    | matching enterotype                                       |   |   |   | Y   | Y   | does enterotype match between D-R or R-P                                                                                     |
|                                       | metabolic pathway distance                                |   |   |   | Y   | Y   | Aitchinson distance of Gut Metabolic Module composition                                                                      |
|                                       | proteolysis potential                                     | Y | Y | Y |     |     | total fraction of microbiome-encoded metabolic potential, quantified via Gut Metabolic Modules                               |
|                                       | saccharolysis potential                                   | Y | Y | Y |     |     |                                                                                                                              |
|                                       | lipolysis potential                                       | Y | Y | Y |     |     |                                                                                                                              |
|                                       | mucin degradation potential                               | Y | Y | Y |     |     |                                                                                                                              |
| propionate production potential       | Y                                                         | Y | Y |   |     |     |                                                                                                                              |
| butyrogenesis potential               | Y                                                         | Y | Y |   |     |     |                                                                                                                              |
| microbiome:<br>species & strain-level | abundance of other species                                | Y | Y | Y |     |     | rel. abd. of other (non-focal) species in the sample, scaled to unit variance                                                |
|                                       | engraftment of other species                              |   |   | Y |     |     |                                                                                                                              |
|                                       | abundance of focal species                                | Y | Y | Y |     |     | rel. abd. of focal species, scaled to unit variance                                                                          |
|                                       | focal species abundance ratio                             |   |   |   | Y   | Y   | ratio of relative abundance of the focal species in D-R or R-P                                                               |
|                                       | phylogenetic complementarity                              |   | Y |   |     |     | minimum phylogenetic distance of focal species to recipient community pre-FMT, scaled to unit variance                       |
|                                       | functional complementarity                                |   | Y |   |     |     | average representation of focal species' KEGG ortholog repertoire in recipient community pre-FMT                             |
|                                       | allele distance                                           |   |   |   | Y   | Y   | Euclidean distance between intra-specific allele frequencies (i.e., distance between strain populations; see Methods)        |
|                                       | strain population diversity                               | Y | Y | Y |     |     | intra-specific population-wide core genome allele diversity (i.e., strain population diversity in focal sample; see Methods) |

D: donor baseline  
R: recipient pre-FMT baseline  
P: recipient post-FMT
